# Supplementary material
Source: Springer Nature journal article supplement (https://www.springermedizin.de/resource/supplementary/12879_2011_1728_MOESM1_ESM.pdf/9443906)

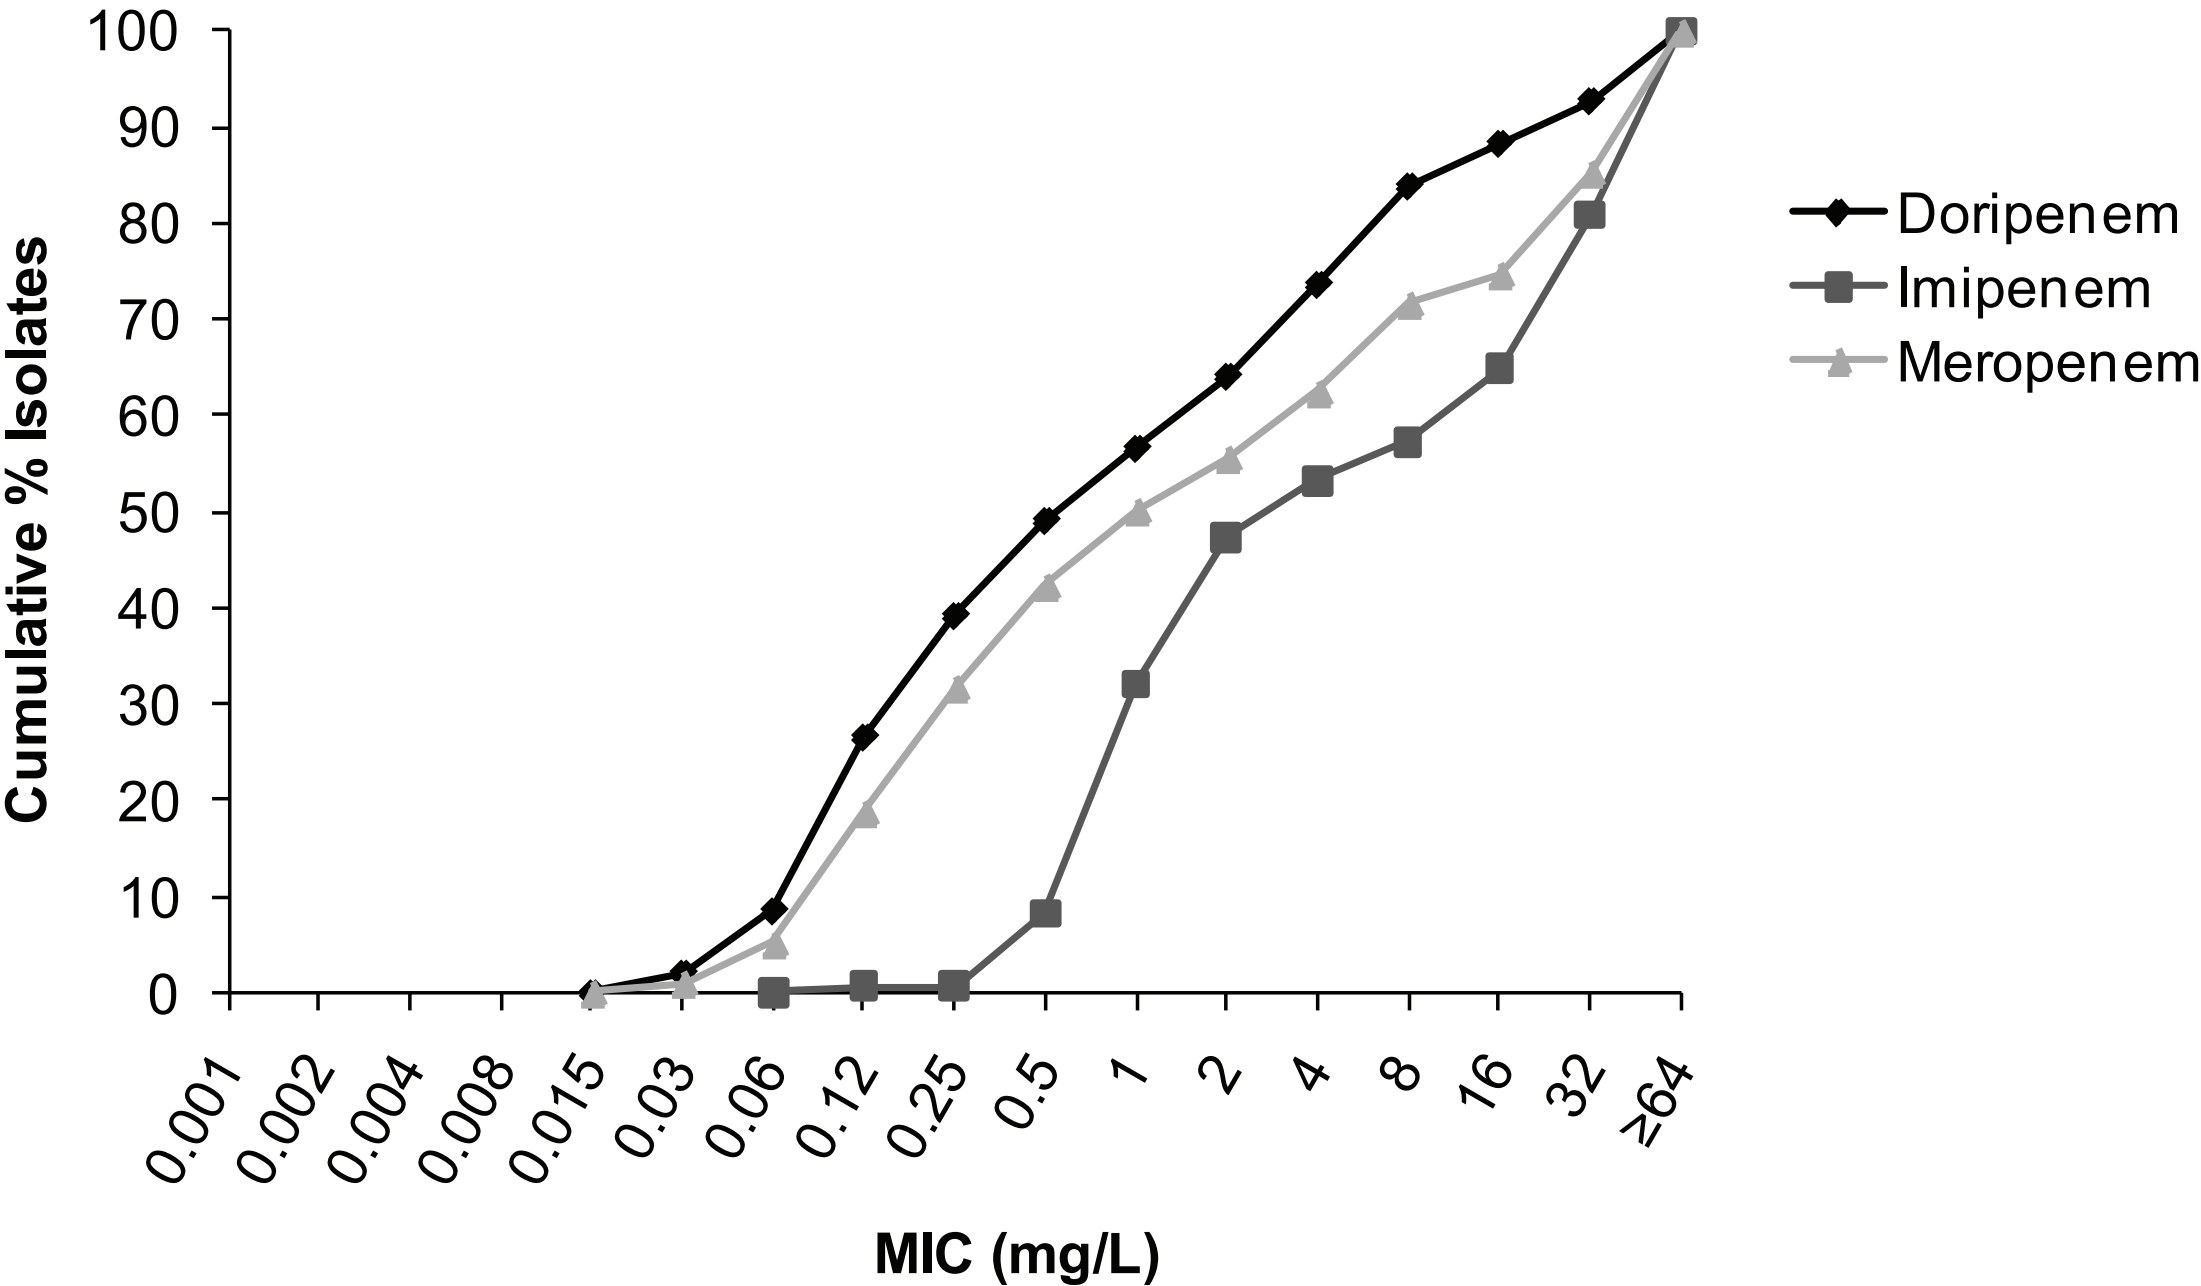

Supplement: MOESM1 [file 9443906]
